# Supplementary material
Source: publisher figshare collection journal article supplement (https://sage.figshare.com/ndownloader/files/14870177)
Supplement: Supplementary file 1 [file 14870177]

Appendix A. Operationalization of dependent variables, mediators and independent variables.

| Dependent variable                                                                                                                                           |                                                                                                                                                                                                                       |
|--------------------------------------------------------------------------------------------------------------------------------------------------------------|-----------------------------------------------------------------------------------------------------------------------------------------------------------------------------------------------------------------------|
| <i>Anti-Muslim attitudes in Wave 3</i><br>7-point scale from 1 ('very positive') to 7 ('very negative')                                                      | 'Muslims are isolating themselves from the Dutch society.'<br>'Muslims easily use violence to solve their problems.'<br>'Muslims use their religion for political ends'                                               |
| Mediators                                                                                                                                                    |                                                                                                                                                                                                                       |
| <i>Economic perceptions in Wave 2</i><br>10-point scale from 1 ('economic situation got/becomes worse') to 10 ('economic situation has/will improve(d)').    | 'How do you think the economy of the Netherlands/European Union has/will evolve(d) in the past/following 12 months?'                                                                                                  |
| <i>Negative emotions in Wave 2</i><br>8-point scale from 1 ('not at all') to 8 ('very strongly')                                                             | 'If you think back about the occasions when you watched or read news about the economy in the past month, how strongly did you feel the following emotions: anger, frustration, fear, anxiety and nervousness?'       |
| Independent variables                                                                                                                                        |                                                                                                                                                                                                                       |
| <i>Lagged dependent variable: anti-Muslim attitudes in Wave 2</i>                                                                                            | Same operationalization as anti-Muslim attitudes in Wave 3                                                                                                                                                            |
| <i>General television news consumption</i>                                                                                                                   | Sum of how frequently respondents watched the following daily newscasts: NOS Journaal, Nieuwsuur, RTL Nieuws, Hart van Nederland, and Editie NL                                                                       |
| <i>Hard television news consumption</i>                                                                                                                      | Sum of how frequently respondents watched the following hard newscasts: NOS Journaal, Nieuwsuur, and RTL Nieuws                                                                                                       |
| <i>Soft television news consumption</i>                                                                                                                      | Sum of how frequently respondents watched the following soft newscasts: Hart van Nederland, Editie NL                                                                                                                 |
| <i>General newspaper reading</i>                                                                                                                             | Sum of how frequently respondent read the following newspapers: Telegraaf, Algemeen Dagblad, Volkskrant, NRC Handelsblad, NRC Next, Trouw, Financieel Dagblad, Reformatorisch Dagblad, Nederlands Dagblad, and Metro. |
| <i>Quality newspaper reading</i>                                                                                                                             | Sum of how frequently respondent read the following quality newspapers: Volkskrant, NRC Next, Handelsblad and Trouw                                                                                                   |
| <i>Popular newspaper reading</i>                                                                                                                             | Sum of how frequently respondent read the following popular newspapers: Telegraaf, Algemeen Dagblad                                                                                                                   |
| Control variables                                                                                                                                            |                                                                                                                                                                                                                       |
| <i>Gender</i><br>Binary, 1 = 'male', 2 = 'female'                                                                                                            | 'What is your gender?'                                                                                                                                                                                                |
| <i>Age</i><br>Continuous in years                                                                                                                            | 'What is your age?'                                                                                                                                                                                                   |
| <i>Household income</i><br>12-point scale 1 = 'lowest income (less than 150 EUR to spend)' to 12 = 'highest income, more than 10 000 EUR to spend')          | 'In what range would classify the monthly net income of your household (all revenues combined)?'                                                                                                                      |
| <i>Educational level</i><br>7-point scale from 1 ('lowest level of education, no degree or primary school degree') to 7 ('highest level, university degree') | 'What is the highest level of education you have completed?'                                                                                                                                                          |
| <i>Unemployment</i><br>Binary, 0 = 'no', 1 = 'yes'                                                                                                           | 'Have you ever become unemployed after leaving school, or after losing your job?'                                                                                                                                     |
| <i>Urban residence</i>                                                                                                                                       | 'Can you describe the neighborhood that you live in?'                                                                                                                                                                 |

**Commented [LJ1]:** @Mark: kan je nakijken, in SPSS file staat de specifieke vraag niet

5-point scale from 1 ('most urbanized') to 5 ('least urbanized')

*Self-reported socioeconomic class*

5-point scale from 1 ('lowest, parents with low education level, income and professional status') to 5 ('highest, parents with high education level, income and professional status')

*Self-reported political left-right orientation*

10 point scale from 1 ('very left-wing') to 10 ('very right-wing')

*PVV vote*

Binary, 0 = 'no', 1 = 'yes'

*Political/economic knowledge*

Average of correct answers on the five knowledge questions: 5-point scale from 1 ('very low political/economic knowledge') to 5 ('very high political/economic knowledge')

'How would you describe the social economic class of the household in which you have been raised?'

'In politics, often the terms left and right are used. Where would you position yourself on a scale where 1 means very left-wing and 10 very right-wing?'

'Have you voted for the Freedom Party (PVV) during the past Parliamentary elections?'

1. If we consider the current interest rates for saving accounts or mortgages, is this interest nowadays lower than average, higher than average or average? (1) lower than average (✓), (2) higher than average, (3) average, (4) I don't know

2. Who is the current Minister for Finances in the Netherlands? (1) Frans Timmermans, (2) Lodewijk Asscher, (3) Jeroen Dijsselbloem (✓), (4) Henk Kamp, (5) I don't know

3. Who is the current director of the International Monetary Fund (IMF)? (1) Dominique Strauss-Kahn, (2) Kofi Annan, (3) Christine Lagarde (✓), (4) Ban Ki-moon, (5) I don't know

4. Which of the following countries does not make part of the five most important European trade partners of the Netherlands? (1) Germany, (2) Belgium, (3) France, (4) Spain (✓), (5) I don't know

5. What is the credit worthiness for the Netherlands according to credit raters Fitch and Moody's? (1) AAA (✓), (2) A, (3) AB, (4) C, (5) I don't know

Percentage unemployment at municipal level (in %)

Percentage of non-Western foreigners at postal code level (in %)

Percentage of unemployment at municipal level according to Statistics Netherlands

Percentage of non-Western foreigners at postal code level according to Statistics Netherlands
